# Chromosome-level genome assembly of *Acanthopagrus latus* using PacBio and Hi-C technologies

Dong Gao<sup>1</sup>, Wenyu Fang<sup>1</sup>, Ying Sims<sup>3</sup>, Joanna Collins<sup>3</sup>, James Torrance<sup>3</sup>, Genmei Lin<sup>1</sup>, Jingui Xie<sup>1</sup>, Kerstin Howe<sup>3</sup>, Jianguo Lu<sup>1, 2\*</sup>

1. School of Marine Sciences, Sun Yat-sen University, Zhuhai, 519082, China

2. Southern Marine Science and Engineering Guangdong Laboratory (Zhuhai), Zhuhai, 519080, China

3. Wellcome Sanger Institute, Cambridge, UK

\*Corresponding author(s): Jianguo Lu ([lujianguo@mail.sysu.edu.cn](mailto:lujianguo@mail.sysu.edu.cn))

**The yellowfin seabream, *Acanthopagrus latus*, is widely distributed throughout the Indo-West Pacific. This fish is an ideal model species in which to study the mechanism of sex reversal since it exhibits a specific feature: sequential hermaphrodite. Here, we report a chromosome-scale assembly of the *A. latus* based on PacBio and Hi-C data. 22,485 protein-coding genes were annotated in whole genome level using transcriptome data. Taken together, this highly accurate, chromosome-level reference genome can provide a valuable resource to elucidate the mechanism of sex reversal for *A. latus*.**

## Background & Summary

Evolution of sex, especially the evolution of different sexual systems, is a fascinating subject in evolutionary biology. The Sparidae, commonly known as seabreams or progies, is a family of fishes of the order Perciformes. And this family consist about 150 species in the world, which are mainly coastal fish<sup>1</sup>. Previous researchers mentioned that Sparidae is an ideal taxon to study the evolution history and adaptive significance of sexual systems, particularly for both types of sequential hermaphroditism, given that this group contains many protogyny, protandry and genochorist species<sup>2</sup>.

The yellowfin seabream, *Acanthopagrus latus* is a protandry species which belongs to the Sparidae family. It is widely distributed in Indo-West Pacific area<sup>3</sup>. It has a great relevance for marine aquaculture and its biology is well focused on reproductive physiology and nutrition<sup>4</sup>. Interestingly, *A. latus* has a special gender feature is that it belongs to protandrous sexual system (initially as male and change later to female)<sup>5</sup>. Most of the past studies of *A. latus* mainly focused on the reproductive biology, population structure, aquaculture and taxonomy<sup>3,4,6-8</sup>. Although some sex reversal related genes were found in *A. latus*, the lack of genomic resources still limit us to elucidate the mechanism

35 of sex reversal for this species.<sup>9,10</sup>. In addition, this lack was also limited the studies of evolution of  
36 sexual systems for Sparidae.

37 In this study, long-read (PacBio SMRT) sequencing and Hi-C sequencing technologies were  
38 applied to construct a high quality reference genome for yellowfin seabream. This high-quality  
39 genome can provide a valuable resource to elucidate the mechanism of sex reversal for *A. latus*.  
40 Furthermore, this genome can also facilitate the studies of evolution of sexual systems for Sparidae.

41

## 42 **Methods**

### 43 **Ethics statement**

44 All experimental procedures in our study with *A. latus* were approved by the Ethics Committee of  
45 Sun Yat-sen University.

### 46 **Sample collection, library construction and sequencing**

47 A wild healthy female yellowfin seabream was captured from the area of Xiangzhou Bay, Zhuhai,  
48 Guangdong Province, China (Fig. 1). Seven tissues were collected respectively for genome  
49 sequencing and genome annotation, including brain, heart, liver, spleen, kidney, gonad and muscle.  
50 These samples were immediately frozen using liquid nitrogen for 30 minutes and then stored at -80°C  
51 for later usage. For high-molecular-weight (HMW) genomic DNA (gDNA) extraction, frozen  
52 samples were lysed in SDS digestion buffer with proteinase K. Then, the lysates were purified using  
53 AMPure XP beads to obtain HMW gDNA. Meanwhile, normal-molecular-weight (NMW) gDNA  
54 was extracted from the same samples using the DNeasy Blood and Tissue Kit (Qiagen, Valencia, CA,  
55 USA).

56 A whole-genome shotgun sequencing strategy was performed for genome size estimation and  
57 polishing of preliminary contigs. A library with 350 bp insert size was constructed from NMW gDNA  
58 using the standard protocol provided by Illumina (San Diego, CA, USA). Paired-end sequencing was  
59 employed using the Illumina NovaSeq platform with a read length of  $2 \times 150$  bp. 38.44 Gbp raw  
60 reads were generated. Adaptor, low-quality and duplicated reads were trimmed with fastp (v0.20.0)<sup>11</sup>.  
61 In total, 34.97 Gbp clean reads were used to genome size estimation and preliminary contig polishing  
62 (Table 1).

63

64

65

66

67

68 **Table 1 Summary of obtained data using multiple sequencing technologies.** Note: The genome size of *A.*  
69 *latus* used to calculate sequencing coverage was 656.61 Mbp, which was estimated using a K-mer analysis of  
70 the short reads.

| Library Type    | Clean data (Gbp) | Average Read Length of Raw Reads (bp) | Sequencing Coverage (×) |
|-----------------|------------------|---------------------------------------|-------------------------|
| <b>Illumina</b> | 34.97            | 150                                   | 51.05                   |
| <b>Pac-Bio</b>  | 180.74           | 16,490                                | 263.85                  |
| <b>Hi-C</b>     | 60.81            | 150                                   | 88.77                   |
| <b>Total</b>    | 276.52           | -                                     | 403.67                  |

71  
72 HWM gDNA was used in DNA template preparation for sequencing on the PacBio System following  
73 the “Template Preparation and Sequencing Guide” provided by Pacific Biosciences (Menlo Park, CA,  
74 USA). The main steps were as follows: extracted DNA was first sheared into large fragments (10  
75 Kbp on average) and then purified and concentrated using AMPure PB beads; DNA damage and ends  
76 induced in the shearing step were repaired; blunt hairpins were subsequently ligated to the repaired  
77 fragment ends; prior to sequencing, the primer was annealed to the SMRTbell template, and then,  
78 DNA polymerase was bound to the annealed templates; finally, DNA sequencing polymerases were  
79 bound to the primer-annealed SMRTbell templates.

80 After sequencing, a total of 180.74 Gbp long reads were generated from the PacBio SEQUEL  
81 platform. The average length of reads was 16.49 Kbp. The long reads covered the genome about  
82  $263.85 \times$  (Table 1).

83 Hi-C sequencing was performed parallel to the PacBio sequencing. We used formaldehyde to fix the  
84 conformation of the HMW gDNA. Then, the fixed DNA was sheared with DpnII restriction enzyme.  
85 The 5' overhangs induced in the shearing step were repaired using biotinylated residues. Following  
86 the ligation of blunt-end fragments *in situ*, the isolated DNA was reverse-crosslinked, purified, and  
87 filtered to remove biotin-containing fragments. Subsequently, DNA fragment end repair, adaptor  
88 ligation, and polymerase chain reaction (PCR) were performed successively. Sequencing was  
89 performed on the Illumina NovaSeq platform and yielded a total of 67.99 Gbp paired-end reads, with  
90 an average sequencing coverage of  $88.77 \times$  (Table 1).

91 In addition, total RNA was extracted from each tissue using TRIZOL (Invitrogen, Carlsbad, CA,  
92 USA). The RNA samples were then treated by Dnase I. The integrity and size distribution were  
93 checked with Bioanalyzer 2100 (Agilent technologies, santa Clara, CA, USA). The high-quality RNA  
94 samples were mixed and then sequenced on Illumina NovaSeq platforms with the manufacturer's  
95 instructions. At last, 69.36 Gbp raw reads were generated for transcriptome-base gene prediction.

## 96 ***De novo* assembly of the *A. latus* genome**

97 In summary, whole-genome shotgun sequencing data were used in estimation of genome size and  
98 polishing of preliminary contigs; PacBio sequencing data were used for preliminary contain assembly;  
99 and Hi-C reads were used in chromosome-level scaffolding.

100 The shotgun sequencing data were used to estimate the genome size with Jellyfish (v2.1.3)<sup>12</sup>. As a  
101 result, the genome size of *A. latus* was estimated to be approximately 656.61 Mbp. All raw long-read  
102 sequences were aligned to each other using ‘dalinger’ executed by the main script of the FALCON  
103 assembler<sup>13</sup>. The overlap data and raw subheads were then processed to generate consensus sequences.  
104 After the error-correction step, FALCON identified the overlaps between all pairs of the  
105 preassembled error-corrected reads. The read overlaps were used to construct a directed string graph  
106 that contains sites of ‘haplotype-fused’ contigs as well as bubbles representing divergent regions  
107 between homologous sequences. Next, FALOCN-Unzip identified read haplotypes using phasing  
108 information from heterozygous positions. Phased reads were then used to assemble haplotigs and  
109 primary contigs. The shotgun sequencing data and PacBio long-reads were used to polish the  
110 preliminary contigs with Nextpolish and Arrow (version 1.21, Pacific BioSciences). The draft  
111 genome of *A. latus* was assembled in 215 contigs. The genome size equivalents to 685.14 Mbp with  
112 contig N50 of 14.88 Mbp (Table 2).

113

114

115

116

117

118

119

120

121

122

123

124

125

126

127

128

129

130

131 **Table 2 Summary of the *A. latus* genome assembly and structural annotation.**

| <b>Genome Assembly</b>            |           |
|-----------------------------------|-----------|
| Contig N50 length (Mbp)           | 14.88     |
| Number of contigs longer than N50 | 18        |
| Number of contigs                 | 215       |
| Scaffold N50 length (Mbp)         | 30.72     |
| Number of contigs longer than N50 | 11        |
| Number of contigs                 | 65        |
| Total contain length (Mbp)        | 685.14    |
| <b>Structural Annotation</b>      |           |
| Number of protein-coding genes    | 29,227    |
| Average genes length (bp)         | 10,797.36 |
| Average exons per gene            | 8.51      |
| Average exons length (bp)         | 172.77    |
| Average CDS length (bp)           | 1,470.37  |
| Average intro length (bp)         | 1, 087.79 |

132

133 To obtain chromosome-level scaffolds, Hi-C reads were filtered in the same way as the shotgun  
134 sequencing reads. Subsequently, filtered Hi-C reads were mapped to *de novo* assembled contigs to  
135 construct contacts among the contigs using BWA (version 0.7.17)<sup>14</sup> with the default parameters.  
136 BAM files containing Hi-C linking messages were processed by another round of filtering, in which  
137 reads were removed if they were not mapped to the reference genome within 500 bp from the nearest  
138 restriction enzyme site. Then, LACHESIS<sup>15</sup> was used for ultra-long-range scaffolding of *de novo*  
139 genome assemblies using the signal of genomic proximity provided by the Hi-C data (Fig. 2).

140 The parameter CLUSTER\_N was used to specify the number of chromosomes. For yellowfin  
141 seabream, this number was determined to be 24 in previous studies<sup>16</sup>. Ultimately, we obtained 24  
142 chromosome-level scaffolds with length of 680.74 Mbp (99.36 % of the total length of genome) (Fig.  
143 2 and Table 3).

144

145

146

147

148

149 **Table 3 Detailed results of chromosome-level scaffolding using Hi-C technology.**

| <b>Chromosomes</b> | <b>Length (Mbp)</b> | <b>Number of Scaffolds</b> | <b>GC%</b> |
|--------------------|---------------------|----------------------------|------------|
| Chr1               | 33.53               | 1                          | 41.8       |
| Chr2               | 32.02               | 1                          | 42.1       |
| Chr3               | 26.36               | 1                          | 42.4       |
| Chr4               | 35.91               | 1                          | 41.7       |
| Chr5               | 31.40               | 1                          | 41.9       |
| Chr6               | 34.04               | 1                          | 41.8       |
| Chr7               | 31.19               | 1                          | 42.2       |
| Chr8               | 31.34               | 1                          | 42.1       |
| Chr9               | 30.72               | 1                          | 41.8       |
| Chr10              | 22.41               | 1                          | 42.3       |
| Chr11              | 31.32               | 1                          | 41.9       |
| Chr12              | 26.68               | 1                          | 41.9       |
| Chr13              | 28.11               | 1                          | 42         |
| Chr14              | 22.16               | 1                          | 42.7       |
| Chr15              | 28.96               | 1                          | 42.1       |
| Chr16              | 25.62               | 1                          | 42.6       |
| Chr17              | 31.84               | 1                          | 42         |
| Chr18              | 31.74               | 1                          | 41.8       |
| Chr19              | 24.96               | 1                          | 42.3       |
| Chr20              | 24.49               | 1                          | 42.3       |
| Chr21              | 28.39               | 1                          | 42         |
| Chr22              | 26.17               | 1                          | 42.1       |
| Chr23              | 25.35               | 1                          | 42.6       |
| Chr24              | 16.04               | 1                          | 43         |
| Total              | 680.74              | 24                         | -          |

150

### 151 **Gene annotation**

152 To obtain a fully annotated *A. latus* genome, three different approaches were employed to predicted  
153 protein-coding gens. *Ab initio* gene prediction was performed on the repeat-masked *A. latus* genome  
154 assembly using Augustus (version 3.3.1)<sup>17</sup> and GeneMark-ES (version 4)<sup>18</sup>. Furthermore, homology-  
155 based prediction was performed using protein sequences of two common model species (*Danio rerio*

156 and *Nile tilapia*) and two related species (*Sparus aurata* and *Larimichthys corcea*). Subsequently,  
157 these protein sequences were mapped onto the generated assembly using GeMoMa (version 1.6.1)<sup>19</sup>.  
158 In addition, transcriptome-based prediction was also applied by RNA-seq data. The RNA-seq reads  
159 were mapped onto the genome assembly using STAR (version 2.7.3a)<sup>20</sup>, and the structures of all  
160 transcribed genes were predicted by Stringtie (version 1.3.4d)<sup>21</sup> with the default parameters. Based  
161 on the results of Stringtie, PASA (version 2.3.3)<sup>22</sup> was used to predicted genes of genome of *A. latus*.  
162 The predicted gene sets, generated from these three approaches, were integrated to produce a non-  
163 redundant gene set using EvidenceModeler (version 1.1.1)<sup>23</sup>. As a result, a total of 29,227 protein-  
164 coding genes were predicted. The average number of eons per gene was 8.51. The average CDS  
165 length was 1,470.37 bp.

166 Gene function annotations were conducted against the NCBI nr and SwissProt protein databases, and  
167 homologs were called with E values of  $< 1 \times 10^{-5}$ . The functional classification of Gene Ontology  
168 (GO) categories was performed using the InterProScan program (version 5.3.2)<sup>24</sup>. Blastp (version  
169 2.7.1)<sup>25</sup> were performed to Kyoto Encyclopedia of Genes and Genomes (KEGG) pathway and  
170 Eukaryotic Orthologous Groups of protein (KOG) annotation analysis. As a result, a total of 22,485  
171 genes were annotated (Fig. 3 and Table 2).

## 172 **Repetitive element characterization**

173 Two software: GMATA (version 2.2)<sup>26</sup> and Tandem Repeats Finder (version 4.07b)<sup>27</sup> were employed  
174 to detect tandem repeats (TRs) in assembly of yellowfin seabream. In addition, tandem repeats were  
175 masked before searching transposable elements (TEs) to avoid the conflicts between TRs and TEs.  
176 A MITE database was constructed, based on masked TR genome, using MITE-hunter<sup>28</sup>. Meanwhile,  
177 a long terminal repeat (LTR) database was obtained by LTR\_FINDER<sup>29</sup> and LTRharvest<sup>30</sup>. Next,  
178 these two databases were combined into a TE library (TE.lib) and repeat sequences of genome were  
179 marked again. A *de novo* repeat sequence library (RepMod.lib) was generated with RepeatModeler<sup>31</sup>  
180 and TEclass<sup>32</sup>. TE.lib, RepMod.lib and Replib were then integrated as a non-redundant repeat  
181 sequence library (nrRep.lib). Subsequently, *A. latus* genome was annotated with nrRep.lib using  
182 RepeatMasker (version 1.331, <http://repeatmasker.org>) to search repeat sequences.

183 Combining the annotation results of TRs and TEs, ~21.24% sequences of the *A. latus* genome were  
184 identified as repetitive elements, including 0.51% long terminal repeats (LTRs), 1.68% long  
185 interspersed nuclear elements (LINEs), 0.1% short interspersed nuclear elements (SINEs) and 5.49%  
186 of DNA transposons, (Fig. 3 and Table 4).

187  
188  
189

190 **Table 4 Detailed classification of repeat sequences.** Note: “Unknown” represents transposable elements  
191 that could not be classified by RepeatMasker.

| Type           | Number of elements | Length of sequence (bp) | Percentage of sequence (%) |
|----------------|--------------------|-------------------------|----------------------------|
| LTR            | 8,942              | 3,512,788               | 0.51                       |
| LINE           | 44,400             | 11,480,725              | 1.68                       |
| SINE           | 6,094              | 686,582                 | 0.10                       |
| DNA            | 206,827            | 37,633,093              | 5.49                       |
| Tandem Repeats | 188,984            | 7,124,823               | 1.04                       |
| Unknown        | 508,488            | 81,118,285              | 11.84                      |
| Other          | 17,306             | 3,984,546               | 0.58                       |
| Total Repeats  | 981,041            | 145,540,842             | 21.24                      |

192

## 193 **Data Records**

194 All sequencing data, including Illumina short reads, PacBio long reads, Hi-C reads were submitted  
195 to the NCBI Sequence Read Archive (SRA) database under Bioproject accession PRJEB40702. The  
196 assembled genome was deposited at DDBJ/ENA/GenBank under the accession GCA\_904848185.1.

## 197 **Technical Validation**

198 The completeness and accuracy of the assembly further assessed in multiple ways. First, the Illumina  
199 reads were re-mapped onto the assembly using BWA. As a result, 99.57% of the reads were accurately  
200 mapped with a coverage of 99.70%. Subsequently, Benchmarking Universal Single-Copy Orthologs  
201 (BUSCO) software (version 3.0.1)<sup>33</sup> was executed using *actinopterygii\_odb9* database to assess the  
202 predicted gene set. The result showed that 98.3% of all 4584 BUSCOs were assembled, including  
203 97.50% and 0.80% of all BUSCOs were completely and partially assembled, also implying a high  
204 level of completeness for the *de novo* assembly (Table 5).

205

206

207

208

209

210

211

212

213

214



215 **Table 5 Details of accuracy and completeness validation of genome assembly.**

**Illumina Reads Mapping**

Mapping ratio 97.09%

Mapping coverage 99.89%

---

**BUSCO** **Number** **Proportion (%)**

---

Total BUSCO groups searched 4,584 100.00

Complete BUSCOs (C) 4,469 97.50

Fragmented BUSCOs (F) 37 0.80

Missing BUSCOs (M) 78 1.70

---

216

217 **Code availability**

218 No custom computer codes were generated in this work.

219

220

221

222

223

224

225

226

227

228

229

230

231

232

233

234

235

236

237

238

239

240

241

242

243

244

245

246

247

248

249

250

251

252

## 253 References

- 254 1 Nelson, J. S., Grande, T. C. & Wilson, M. V. *Fishes of the World*. (John Wiley & Sons, 2016).
- 255 2 Pla, S., Benvenuto, C., Capellini, I. & Piferrer, F. A phylogenetic comparative analysis on the  
256 evolution of sequential hermaphroditism in seabreams (Teleostei: Sparidae). *Scientific Reports* **10**,  
257 3606, doi:10.1038/s41598-020-60376-w (2020).
- 258 3 Iwatsuki, Y. Review of the *Acanthopagrus latus* complex (Perciformes: Sparidae) with descriptions  
259 of three new species from the Indo-West Pacific Ocean. *Journal of fish biology* **83**, 64-95 (2013).
- 260 4 Abol-Munafi, A. & UMEDA, S. The gonadal cycle of the yellowfin porgy, *Acanthopagrus latus*  
261 (Houttuyn) reared in the net cage at Tosa Bay, Japan. *Aquaculture Science* **42**, 135-144 (1994).
- 262 5 Buxton, C. D. & Garratt, P. A. Alternative reproductive styles in seabreams (Pisces: Sparidae).  
263 *Environmental Biology of Fishes* **28**, 113-124, doi:10.1007/BF00751031 (1990).
- 264 6 Abu-Hakima, R. Some aspects of the reproductive biology of *Acanthopagrus* spp.(Family: Sparidae).  
265 *Journal of fish biology* **25**, 515-526 (1984).
- 266 7 Syazni, K. A., Tomano, S., Ueno, K., Ohara, K. & Umino, T. J. A. S. Genetic structure of yellowfin  
267 black seabream *Acanthopagrus latus* in western Japan based on microsatellite and mtDNA marker  
268 analyses. **63**, 17-27 (2015).
- 269 8 Karimi, S., Kochinian, P. & Salati, A. J. I. J. o. V. R. The effect of sexuality on some haematological  
270 parameters of the yellowfin seabream, *Acanthopagrus latus* in Persian Gulf. **14**, 65-68 (2013).
- 271 9 Li, S. *et al.* Identification and Comparison of microRNAs in the Gonad of the Yellowfin Seabream  
272 (*Acanthopagrus Latus*). **21**, 5690 (2020).
- 273 10 Li, S. *et al.* Gonadal Transcriptome Analysis of Sex-Related Genes in the Protandrous Yellowfin  
274 Seabream (*Acanthopagrus latus*). **11**, doi:10.3389/fgene.2020.00709 (2020).
- 275 11 Chen, S., Zhou, Y., Chen, Y. & Jia, G. fastp: an ultra-fast all-in-one FASTQ preprocessor.  
276 *Bioinformatics* **34**, i884-i890 (2018).
- 277 12 Marçais, G. & Kingsford, C. A fast, lock-free approach for efficient parallel counting of occurrences  
278 of k-mers. *Bioinformatics* **27**, 764-770, doi:10.1093/bioinformatics/btr011 (2011).
- 279 13 Chin, C.-S. *et al.* Phased diploid genome assembly with single-molecule real-time sequencing.  
280 *Nature Methods* **13**, 1050-1054, doi:10.1038/nmeth.4035 (2016).
- 281 14 Li, H. & Durbin, R. Fast and accurate short read alignment with Burrows-Wheeler transform.  
282 *Bioinformatics (Oxford, England)* **25**, 1754-1760, doi:10.1093/bioinformatics/btp324 (2009).
- 283 15 Burton, J. N. *et al.* Chromosome-scale scaffolding of de novo genome assemblies based on  
284 chromatin interactions. *Nature Biotechnology* **31**, 1119-1125, doi:10.1038/nbt.2727 (2013).
- 285 16 Jiahan, L. & Lisha, L. Studies on karyotype of *Sparus latus* Houttuyn. *J. Oceanogr. Taiwan Strait* **8**,  
286 162-166 (1989).
- 287 17 Stanke, M., Diekhans, M., Baertsch, R. & Haussler, D. Using native and syntenically mapped cDNA  
288 alignments to improve de novo gene finding. *Bioinformatics* **24**, 637-644,  
289 doi:10.1093/bioinformatics/btn013 (2008).
- 290 18 Alexandre, L., Vardges, T. H., Chernoff, Y. O. & Mark, B. Gene identification in novel eukaryotic  
291 genomes by self-training algorithm. *Nucleic Acids Research*, 20 (2005).
- 292 19 Keilwagen, J. *et al.* Using intron position conservation for homology-based gene prediction. *Nucleic*  
293 *Acids Research* **44**, e89-e89, doi:10.1093/nar/gkw092 (2016).
- 294 20 Valencia, A. STAR: ultrafast universal RNA-seq aligner. *Bioinformatics* (2014).
- 295 21 Pertea, M. *et al.* StringTie enables improved reconstruction of a transcriptome from RNA-seq reads.  
296 *Nature Biotechnology* **33**, 290-295, doi:10.1038/nbt.3122 (2015).
- 297 22 Haas, B. J. *et al.* Improving the Arabidopsis genome annotation using maximal transcript alignment  
298 assemblies. *Nucleic Acids Research* **31**, 5654-5666, doi:10.1093/nar/gkg770 (2003).
- 299 23 Haas, B. J. *et al.* Automated eukaryotic gene structure annotation using EVIDENCEModeler and the  
300 Program to Assemble Spliced Alignments. *Genome Biology* **9**, R7, doi:10.1186/gb-2008-9-1-r7  
301 (2008).
- 302 24 Jones, P. *et al.* InterProScan 5: genome-scale protein function classification. *Bioinformatics (Oxford,*  
303 *England)* **30**, 1236-1240, doi:10.1093/bioinformatics/btu031 (2014).
- 304 25 Altschul, S. F., Gish, W., Miller, W., Myers, E. W. & Lipman, D. J. Basic local alignment search  
305 tool. *Journal of Molecular Biology* **215**, 403-410, doi:[https://doi.org/10.1016/S0022-2836\(05\)80360-](https://doi.org/10.1016/S0022-2836(05)80360-2)  
306 [2](https://doi.org/10.1016/S0022-2836(05)80360-2) (1990).

- 307 26 Wang, X. & Wang, L. GMATA: An Integrated Software Package for Genome-Scale SSR Mining,  
308 Marker Development and Viewing. *Frontiers in Plant Science* **7**, doi:10.3389/fpls.2016.01350  
309 (2016).
- 310 27 Benson, G. Tandem repeats finder: a program to analyze DNA sequences. *Nucleic Acids Research*  
311 **27**, 573-580, doi:10.1093/nar/27.2.573 (1999).
- 312 28 Han, Y. & Wessler, S. R. MITE-Hunter: a program for discovering miniature inverted-repeat  
313 transposable elements from genomic sequences. *Nucleic Acids Research* **38**, e199-e199,  
314 doi:10.1093/nar/gkq862 (2010).
- 315 29 Xu, Z. & Wang, H. LTR\_FINDER: an efficient tool for the prediction of full-length LTR  
316 retrotransposons. *Nucleic acids research* **35**, W265-W268, doi:10.1093/nar/gkm286 (2007).
- 317 30 Ellinghaus, D., Kurtz, S. & Willhoeft, U. LTRharvest, an efficient and flexible software for de novo  
318 detection of LTR retrotransposons. *BMC bioinformatics* **9**, 18, doi:10.1186/1471-2105-9-18 (2008).
- 319 31 Bedell, J. A., Korf, I. & Gish, W. MaskerAid : a performance enhancement to RepeatMasker.  
320 *Bioinformatics* **16**, 1040-1041, doi:10.1093/bioinformatics/16.11.1040 (2000).
- 321 32 Abrusán, G., Grundmann, N., DeMester, L. & Makalowski, W. TEclass—a tool for automated  
322 classification of unknown eukaryotic transposable elements. *Bioinformatics* **25**, 1329-1330,  
323 doi:10.1093/bioinformatics/btp084 (2009).
- 324 33 Simão, F. A., Waterhouse, R. M., Ioannidis, P., Kriventseva, E. V. & Zdobnov, E. M. BUSCO:  
325 assessing genome assembly and annotation completeness with single-copy orthologs. *Bioinformatics*  
326 **31**, 3210-3212, doi:10.1093/bioinformatics/btv351 (2015).
- 327

## 328 **Acknowledgements**

329 This work was supported by Guangzhou Science and Technology Project [No. 201803020017], National  
330 Natural Science Foundation of China [No. 91858208], [No. 31902427], R&D Project for Jinwan Yellowfin  
331 Seabream Breeding System Construction [No. K20-42000-018], Science and Technology Project of  
332 Zhanjiang [No. 2019A03011], and Innovation Group Project of Southern Marine Science and Engineering  
333 Guangdong Laboratory (Zhuhai) [No. 311020005].

334

## 335 **Author Contributions**

336 J. L. conceived the study. D. G., W. F. and J. X. collected the samples. D. G. and G. L. extracted the  
337 genomic DNA. D. G., Y. S., J. T., J. C. and K. H. assembled and curated the genome. D. G. and J.  
338 L. wrote, reviewed and edited the manuscript.

## 339 **Competing Interests**

340 The authors declare no competing interests.

341  
342  
343  
344  
345  
346  
347  
348  
349  
350

351 **Figures**  
352 **Fig. 1**

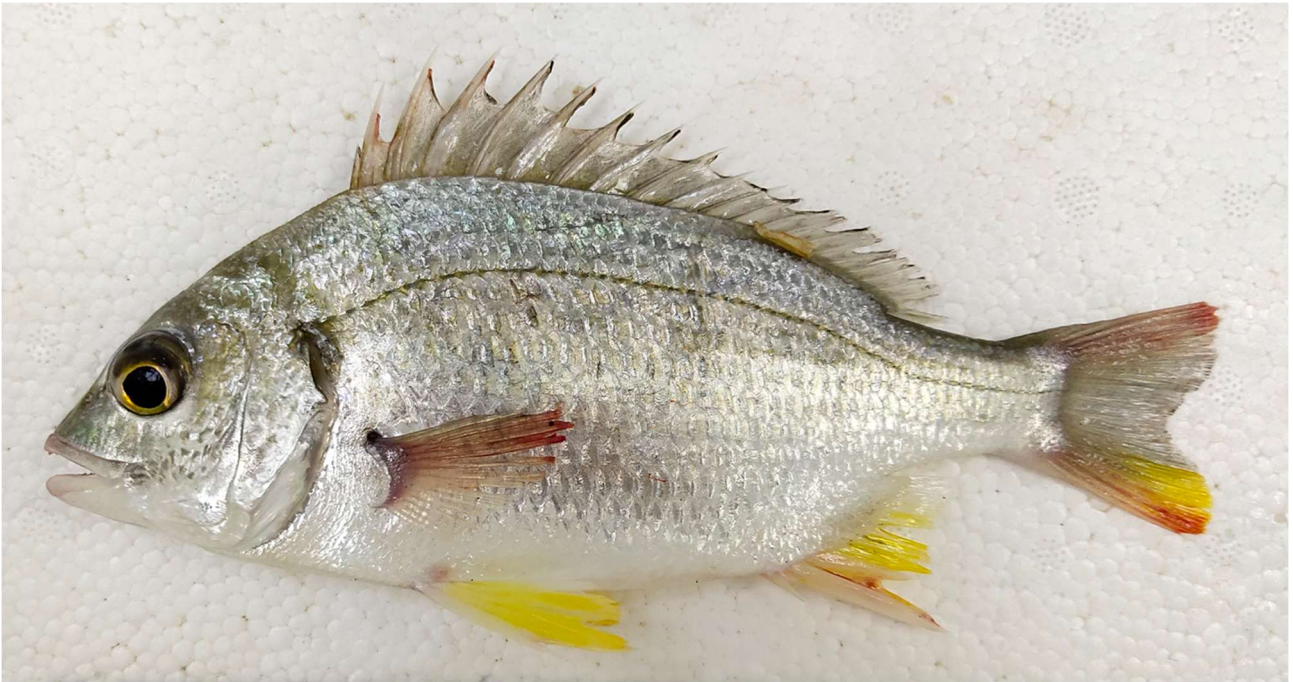

353  
354  
355  
356  
357  
358  
359  
360  
361  
362  
363  
364  
365  
366  
367  
368  
369  
370  
371  
372  
373  
374  
375  
376

377 **Fig. 2**

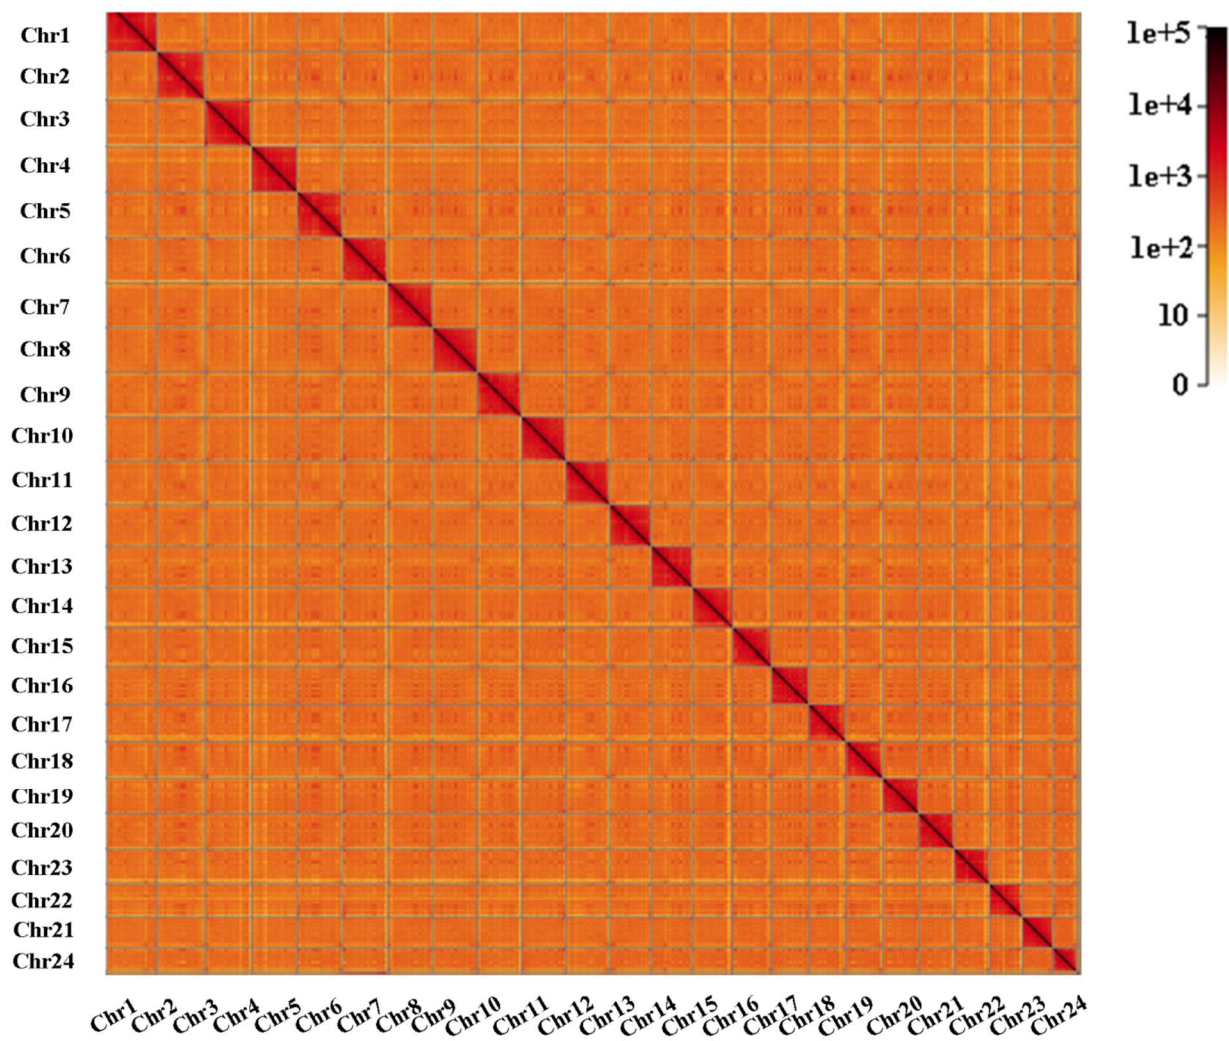

378

379

380

381

382

383

384

385

386

387

388

389

390

391

392

393

394

395 **Fig. 3**

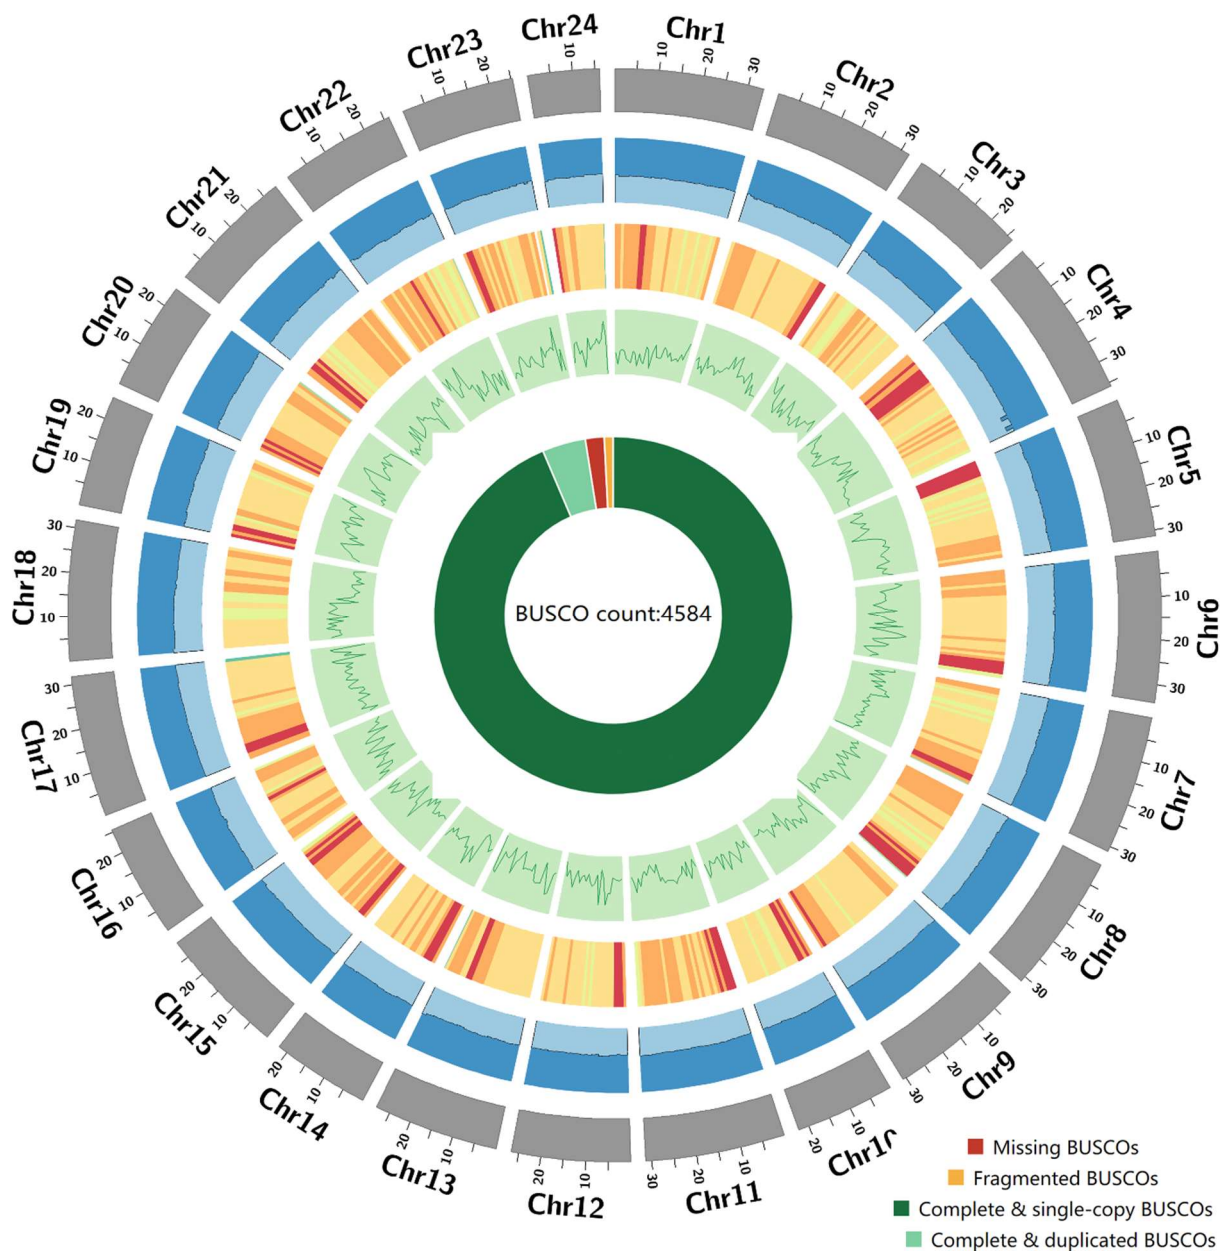

410 **Figure Legends**

411 Fig. 1 A healthy female yellowfin seabream was collected.

412 Fig. 2 Genome-wide all by all Hi-C interaction of *A. latus*.

413 Fig.3 Circos plot showing 24 chromosomes of *A. latus*. Note: chromosome length in Mb unit; the blue  
414 histogram presents the GC content for 1 Mbp window; heatmap of repeats density within 1 Mbp window,  
415 ranging from 27 to 2,198 repeat sequences per million base pairs; line plot of gene density for 1 Mbp windows  
416 and the innermost pie chart displays the completeness validation results of genome assembly using BUSCO.
